# Supplementary material for: Serum kallistatin level is decreased in women with preeclampsia
Source: publisher site journal article supplement (doi:10.1515/jpm-2020-0142), 2020-08-31
Supplement: Supplementary file 1 [file j_jpm-2020-0142_suppl_002.docx]

| **Supplementary Table 2.** The Pearson correlation analysis of kallistatin and various parameters in all participants (n=220) | | |
| --- | --- | --- |
|  | r | p |
| Age | 0.009 | 0.906 |
| BMI | 0.017 | 0.828 |
| Parity | -0.013 | 0.867 |
| Systolic arterial blood pressure | -0.290 | **<0.001** |
| Diastolic arterial blood pressure | -0.290 | **<0.001** |
| GA at sampling | 0.163 | **0.038** |
| GA at birth | 0.262 | **0.002** |
| WBC | -0.051 | 0.539 |
| Platelet count | 0.004 | 0.963 |
| Creatinine | -0.166 | **0.041** |
| Total bilirubin | -0.001 | 0.987 |
| Uric acid | -0.151 | 0.072 |
| BUN | -0.135 | 0.097 |
| AST | -0.120 | 0.142 |
| ALT | -0.062 | 0.453 |
| ALT, alanine aminotransferase; AST, aspartate aminotransferase; BMI, body-mass-index; BUN, blood urea nitrogen; GA, gestational age; WBC, white blood cells  r; correlation coefficient  p<0.05 is significant, bold is significant. | | |
